# Supplementary material for: A novel molecular diagnostics platform for somatic and germline precision oncology
Source: PubMed Central journal article supplement (PMC5511795; doi:10.1002/mgg3.291), 2017-04-23
Supplement: MGG3-5-336-s001.pdf [file MGG3-5-336-s001.pdf]

# Sample Tumor Report

## GENOMIC ALTERATIONS DETECTED WITH THERAPEUTIC IMPLICATIONS

| Gene | Reference transcript | Variant                    | Variant consequence (molecular) | Somatic status   | % Tum. cel. mut. | Drugs approved in the analyzed tumor | Drugs approved in other tumors                       |
|------|----------------------|----------------------------|---------------------------------|------------------|------------------|--------------------------------------|------------------------------------------------------|
| PTEN | NM_000314            | c.867dupA; p.Val290Serfs*8 | Frameshift / Premature STOP     | Inferred somatic | 100%             | Everolimus (FDA, no EMA)             | Everolimus, temsirolimus, olaparib                   |
|      | NM_000314            | Deletion                   | Copy number loss (n=1)          |                  |                  |                                      |                                                      |
| BAP1 | NM_004656            | Deletion                   | Copy number loss (n=1)          | Inferred somatic | Not applicable   | None                                 | Olaparib, valproic acid, vorinostat and panobinostat |

No actionable alterations have been found in the following genes relevant in lung tumors: ALK, ARAF, BRAF, DDR2, EGFR, EPHA2, ERBB2, ERBB4, FGFR1, FGFR2, IGF1R, KRAS, MET, KMT2D, NRAS, NRG1, NTRK1, PIK3CA, RET, RICTOR, ROS1, STK11.

## SCIENTIFIC AND MEDICAL EVIDENCE SUPPORTING THE ASSOCIATIONS BETWEEN GENOMIC ALTERATIONS AND DRUGS

| Variant                                                      | Therapy                 | Tumor type           | Effect      | Level of evidence <sup>3</sup> | References (PMID, abstract) |
|--------------------------------------------------------------|-------------------------|----------------------|-------------|--------------------------------|-----------------------------|
| PTEN<br>c.867dupA;<br>p.Val290Serfs*8<br>+<br>Deletion (n=1) | PI3K pathway inhibitors | Lung cancer          | Sensitivity | Preclinical                    | 23136191                    |
|                                                              |                         | Prostate cancer      | Response    | Early clinical trial           | 23582881                    |
|                                                              | PARP inhibitors         | Endometrial cancer   | Response    | Case report                    | 21468130, 20944090          |
| BAP1<br>Deletion (n=1)                                       | PARP Inhibitors         | Renal cell carcinoma | Sensitivity | Preclinical                    | 22683710                    |
|                                                              | HDAC inhibitors         | Melanoma             | Sensitivity | Preclinical                    | 22038994                    |

The order of presentation of genomic alterations is not necessarily related to the clinical relevance or the potential efficacy of therapies. Additional associations may exist which are not shown because they do not provide different therapeutic options or higher levels of evidence

## CANCER DRUGS ASSOCIATED TO THE DETECTED GENOMIC ALTERATIONS

- Everolimus, Temsirolimus:** PTEN, FLCN or PIK3R1 inactivating genomic alterations have been related to response/sensitivity to PI3K/mTOR pathway inhibitors, such as GDC-0941, everolimus or LY3023414, in non small cell lung cancer, prostate cancer, renal cell carcinoma and endometrial cancer. Everolimus is an mTOR inhibitor approved by the FDA (not yet by the EMA) for the treatment of neuroendocrine lung tumors, among other cancer types. Everolimus is approved by the EMA for the treatment of breast cancer, pancreatic neuroendocrine tumors, and renal cell carcinomas. Temsirolimus is another mTOR inhibitor approved for the treatment of renal cell carcinoma, and approved by the EMA (not yet by the FDA) for the treatment of mantle cell lymphoma.
- Olaparib:** PTEN, BAP1 or BRCA2 inactivating genomic alterations have been related to response/sensitivity to PARP inhibitors, such as olaparib or KU0058948, in endometrial cancer, renal cell carcinoma and ovarian cancer. There are no PARP inhibitors approved for the treatment of neuroendocrine lung tumors. Olaparib is a PARP inhibitor approved for the treatment of ovarian cancer.
- Valproic acid, Vorinostat, Panobinostat:** BAP1 inactivating genomic alterations have been related to sensitivity to HDAC inhibitors, such as valproic acid, trichostatin A, panobinostat and suberoylanilide hydroxamic acid, in melanoma. There are no HDAC inhibitors approved for the treatment of neuroendocrine lung tumors. Valproic acid is an HDAC inhibitor approved for the treatment of several neurological disorders. Likewise, vorinostat is an HDAC inhibitor approved for the treatment of cutaneous T-cell lymphoma (CTCL), whereas panobinostat is another HDAC inhibitor approved by the EMA (not yet by the FDA) for the treatment of multiple myeloma.

## ADDITIONAL COMMENTS

The copy number detected for the tumor suppressor BAP1 (n=1; compatible with the presence of a wild-type allele) together with the lack of detection of additional inactivation alterations of this gene, do not support its putative loss of function in the tumor.

| TP53 genomic status | Mutated | Alteration | p.Gln317* + Deletion | Alteration type | Frameshift / Premature STOP + Copy number loss (n=1) | % Tum. cel. mut. | 100% |
|---------------------|---------|------------|----------------------|-----------------|------------------------------------------------------|------------------|------|
|---------------------|---------|------------|----------------------|-----------------|------------------------------------------------------|------------------|------|

TP53 genomic status is shown exclusively as complementary information as, currently, it is not associated with any approved targeted cancer therapy

## GENOMIC ALTERATIONS DETECTED WITH UNCERTAIN CLINICAL SIGNIFICANCE

5 ALTERATIONS

| Gene   | Alteration  | Alteration type        | % Tum. cel. mut. |
|--------|-------------|------------------------|------------------|
| CTNNB1 | Deletion    | Copy number loss (n=1) | Not applicable   |
| MAP2K1 | p.Arg201His | Missense               | 50%-100%         |
| MITF   | Deletion    | Copy number loss (n=1) | Not applicable   |
| PTCH1  | p.Pro299Leu | Missense               | 55%-100%         |
| RAF1   | Deletion    | Copy number loss (n=1) | Not applicable   |

AVERAGE COVERAGE

% OF COVERED SEQUENCE (CALLABILITY)

| ≥10 READS (DP10) ≥20 | READS (DP20) ≥50 | READS (DP50) ≥50 | READS (DP100) |
|----------------------|------------------|------------------|---------------|
| 1201.80x             | 100%             | 99.999%          | 99.91%        |

1 OF THE 1538 GENOMIC REGIONS ANALYZED HAS SHOWN COVERAGE BELOW 100% AT DP20 (20 READS)

| Coordinates           | Size | % OF SEQUENCE COVERED BY ≥10 READS (DP10) | % OF SEQUENCE COVERED BY ≥20 READS (DP20) | GENE  | RefSeq ID | Specific positions with less than 20 reads |
|-----------------------|------|-------------------------------------------|-------------------------------------------|-------|-----------|--------------------------------------------|
| 2:212488638-212495329 | 6692 | 100%                                      | 99.985%                                   | ERBB4 | NM_005235 | c.2079+957                                 |
