# Supplementary material for: A novel molecular diagnostics platform for somatic and germline precision oncology
Source: PubMed Central journal article supplement (PMC5511795; doi:10.1002/mgg3.291), 2017-04-23
Supplement: MGG3-5-336-s002.pdf [file MGG3-5-336-s002.pdf]

## Sample Germline Report – Front Page

### PATHOGENIC VARIANTS

| Gene | Variant    |              | Alteration type               | Zygosity | Cancer phenotypes associated to the variant |
|------|------------|--------------|-------------------------------|----------|---------------------------------------------|
|      | DNA        | Protein      |                               |          |                                             |
| NF1  | c.2033dupC | p.I679Dfs*21 | Frameshift/<br>Premature STOP | Mosaic*  | Neurofibromatosis, Type 1                   |

\*The frequency of this variant in the analyzed sample is 0.103. This is compatible with a mosaic mutation present in heterozygosity in 20.6% of nucleated blood cells (primary sample from which germline DNA was obtained)

### LIKELY PATHOGENIC VARIANTS

No variant of this category has been found

### VARIANTS WITH UNCERTAIN CLINICAL SIGNIFICANCE

| Gene  | Variant      |              | Alteration type | Zygosity     | Cancer phenotypes associated to the gene                                              |
|-------|--------------|--------------|-----------------|--------------|---------------------------------------------------------------------------------------|
|       | DNA          | Protein      |                 |              |                                                                                       |
| BRCA1 | c.3083G>A    | p.R1028H     | Missense        | Heterozygous | Breast and/or ovary cancer                                                            |
| FANCA | c.3348+18A>G | No aplicable | 5' UTR          | Heterozygous | Fancony anemia<br>(autosomal recessive inheritance)<br>Association with breast cancer |

### ADDITIONAL COMMENTS

Regarding the reason for request, the analysis of genetic alterations in MLH1, MSH2, MSH6, PMS2 and EPCAM has not revealed alterations considered pathogenic.

The pathogenic variant NF1 p.I679Dfs\*21 has been validated by PCR + Sanger sequencing, obtaining results consistent with its presence in the indicated frequency (0.103), what is compatible with the patient being a mosaic for this alteration.

The clinical consequences of the results herein reported must be evaluated by a genetic counsellor.

**Cabanillas *et al.* Figure S2**
