# Supplementary material for: A novel molecular diagnostics platform for somatic and germline precision oncology
Source: PubMed Central journal article supplement (PMC5511795; doi:10.1002/mgg3.291), 2017-04-23

c.2466T>C

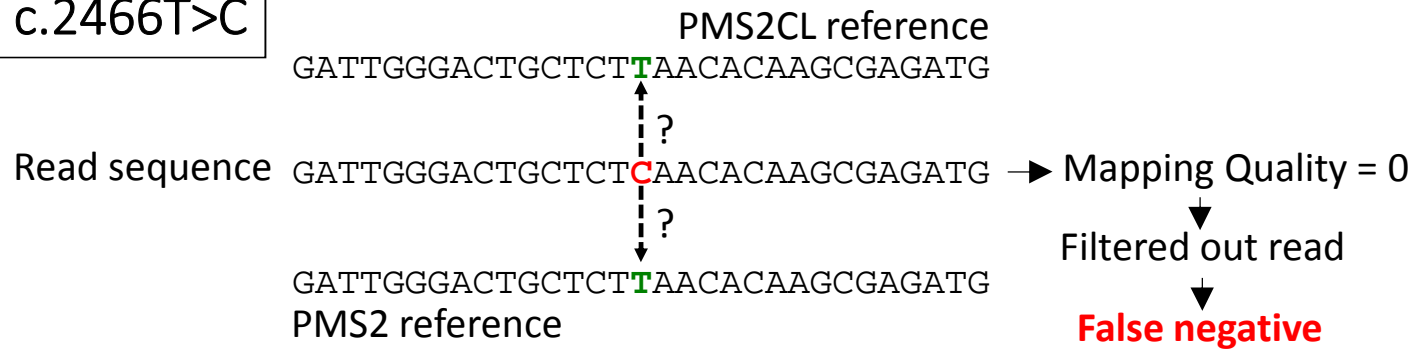

c.\*92dupA

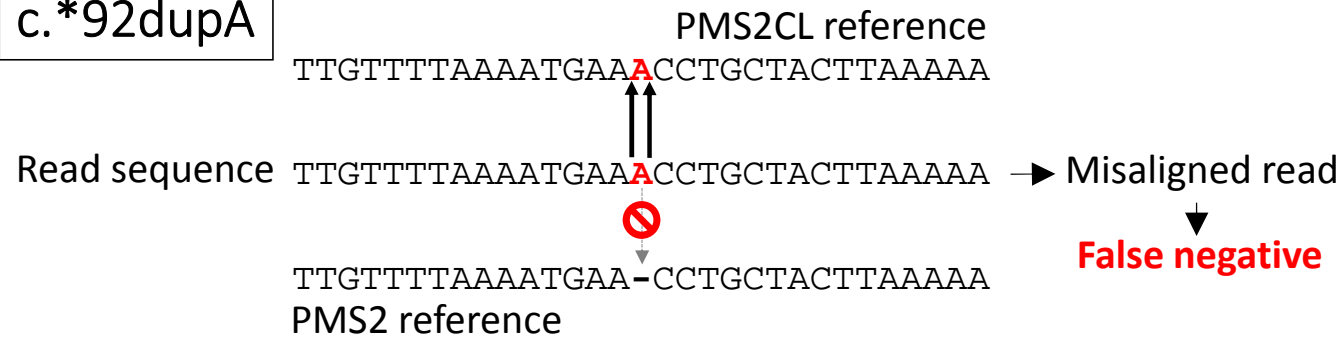

Supplement: MGG3-5-336-s004.pdf [file MGG3-5-336-s004.pdf]
