# Supplementary material for: A novel molecular diagnostics platform for somatic and germline precision oncology
Source: PubMed Central journal article supplement (PMC5511795; doi:10.1002/mgg3.291), 2017-04-23
Supplement: MGG3-5-336-s005.pdf [file MGG3-5-336-s005.pdf]

Reference G G G C T T G T C G G C A A A T C G G G G G G T T C C G C T G C A T C C T G C T G C A C

WT

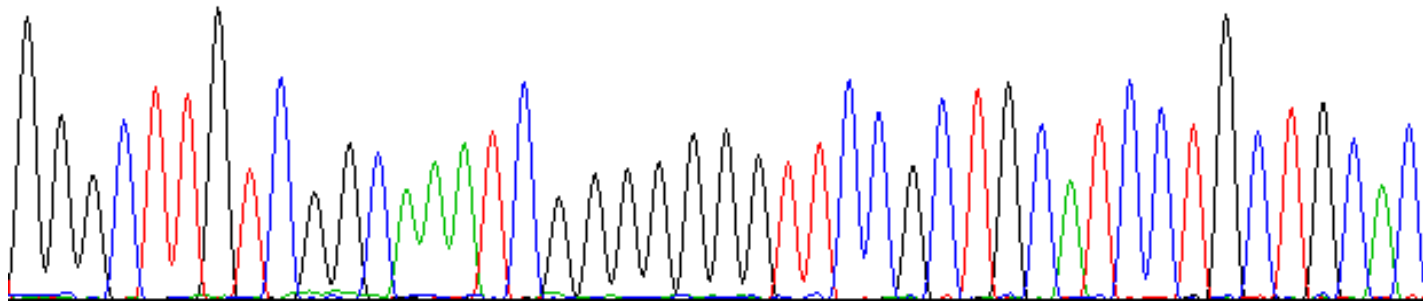

P01682

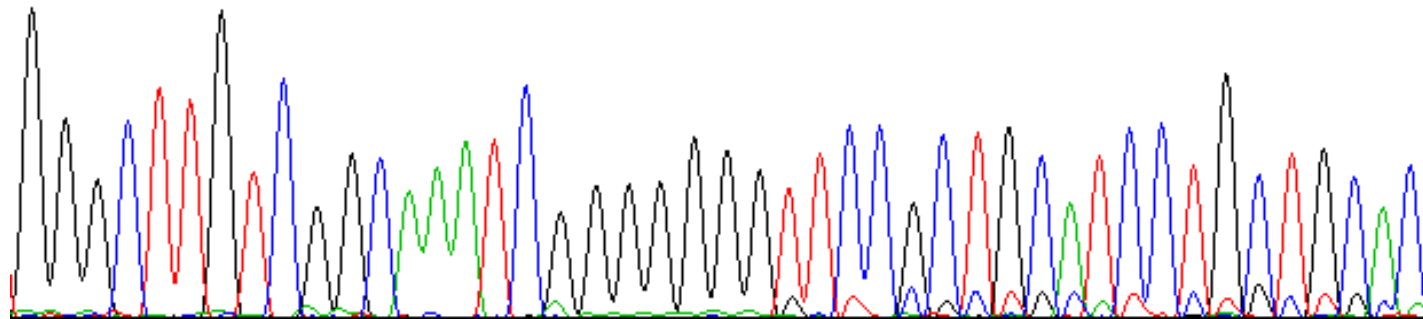

G G G C T T G T C G G C A A A T C G G G G G G T T C C G C T G C A T C C T G C T G C A  
Mosaic NF1 (NM\_000267) c.2033dupC, p.(I679Dfs\*21) (10.3%)

Cabanillas *et al.* Figure S5
